# Supplementary material for: Overexpression of lily MicroRNA156-resistant SPL13A stimulates stem elongation and flowering in Lilium formosanum under non-inductive (non-chilling) conditions
Source: PubMed Central journal article supplement (PMC11527630; doi:10.3389/fpls.2024.1456183), 2024-10-18
Supplement: DataSheet1.pdf [file DataSheet1.pdf]

**Supplementary TABLE S1.** List of PCR primers

|                            | Forward primer                                                                                       | Reverse primer                                                                         |
|----------------------------|------------------------------------------------------------------------------------------------------|----------------------------------------------------------------------------------------|
| <b>Vector construction</b> |                                                                                                      |                                                                                        |
| 35S::SPL13A                | AAA tctaga AGTCATGGATTGGGATTTGAAG<br><u>TGCGCATTGAGCTTGTAAAGT</u> CACCCATCCAATCTCAAG                 | <u>ACTTAACAAGCTCAATGCGCA</u> ATCAGAGTCGTGAACATGGG<br>GGT gagctc TACTGCCAAGAAAATGGAAGAG |
| 35S::SPL13A(rSPL13A)-GFP   | AAA tctaga AGTCATGGATTGGGATTTGAAG<br><u>GGTGCGGGAAGCGGCGGA</u> GGTAGTGCCGGAGGTAGCATGAGTAAAGGAGAAGAAC | <u>TGCGCGCTTCGCGCACCC</u> CTGCCAAGAAAATGGAAGAG<br>ATT gagctc TTATTTGTATAGTTCATCCATG    |
| 35S::AtMIR156B             | TTT tctaga TTTGACAAAACATCATGTCTCTCCA                                                                 | TTC gagctc CTTCAAACCAAACGCAAAGACTTT                                                    |
| 35S::AtMIR172B             | ATC tctaga CTAGTCTTGTGTGCACCCATTTATGTG                                                               | CTC gagctc CTC AAGTCAAGATCAAAGGCAAAATAG                                                |
| <b>qRT-PCR</b>             |                                                                                                      |                                                                                        |
| SPL13A                     | ACAATCGGCGTCGACGCAAG                                                                                 | TGTGGAAGTGTGTTGCCTG                                                                    |
| FT1                        | ATGGAGAATAGGAGTGATCCTTGCTG                                                                           | TTCTCTAAGGTTGGTTACTTGG                                                                 |
| FT8                        | GAGGGAGTATTTTTRCACTGGTTGGT                                                                           | TAAAGATCAGAAAARTTCCGGGTA                                                               |
| MADS5                      | ACTCCAACAACAGAGCAGC                                                                                  | AAGCCCTCATCTTCTGGAAC                                                                   |
| ACTIN                      | GGAGTGAGCCACACAGTTCC                                                                                 | ATAGCTTTCTCCACAGAGG                                                                    |
| NPTII                      | TGAATGAACAGGACGAG                                                                                    | ATACTTTCTCGGACGAGCA                                                                    |
| <b>Stem-Loop PCR</b>       |                                                                                                      |                                                                                        |
| miR156, cDNA synthesis     |                                                                                                      | GTTGGCTCTGGTGCAGGGTCCGAGGTATTGCACCAGAGCCAACGTGCTC                                      |
| miR156, qRT-PCR            | TCGCGTGACAGAAGAGAGT                                                                                  | GTGCAGGGTCCGAGGT                                                                       |
| miR172A, cDNA synthesis    |                                                                                                      | GTTGGCTCTGGTGCAGGGTCCGAGGTATTGCACCAGAGCCAACGTGCTC                                      |
| miR172A, qRT-PCR           | TCGCGAGAATCTTGATGATG                                                                                 | GTGCAGGGTCCGAGGT                                                                       |
| miR172B, cDNA synthesis    |                                                                                                      | GTTGGCTCTGGTGCAGGGTCCGAGGTATTGCACCAGAGCCAACATGCAG                                      |
| miR172B, qRT-PCR           | TCGCGAGAATCTTGATGATG                                                                                 | GTGCAGGGTCCGAGGT                                                                       |
| U6, cDNA synthesis         |                                                                                                      | CGATTTGTGCGTGTATCCTTGC                                                                 |
| U6, qRT-PCR                | CGGGGACATCCGATAAAAATTGGAACG                                                                          | CGATTTGTGCGTGTATCCTTGC                                                                 |

Lowercase letters indicate restriction sites. Overlapped regions are shown by underlines.

**Supplementary TABLE S2.** GenBank/DDBJ/EMBL accession numbers of Arabidopsis SPL sequences

| SPL     | Accession number |
|---------|------------------|
| AtSPL13 | NP_568731        |
| AtSPL2  | NP_199141        |
| AtSPL10 | NP_001323272     |
| AtSPL11 | NP_001077603     |
| AtSPL8  | NP_973738        |
| AtSPL9  | AY046007         |
| AtSPL15 | NP_191351        |
| AtSPL6  | NP_177077        |
| AtSPL3  | U50647           |
| AtSPL4  | NP_175723        |
| AtSPL5  | CAB56772         |
| AtSPL7  | OAO96340         |
| AtSPL14 | NP_173522        |
| AtSPL16 | NP_177784        |
| AtSPL12 | NP_191562        |
| AtSPL1  | NP_850468        |

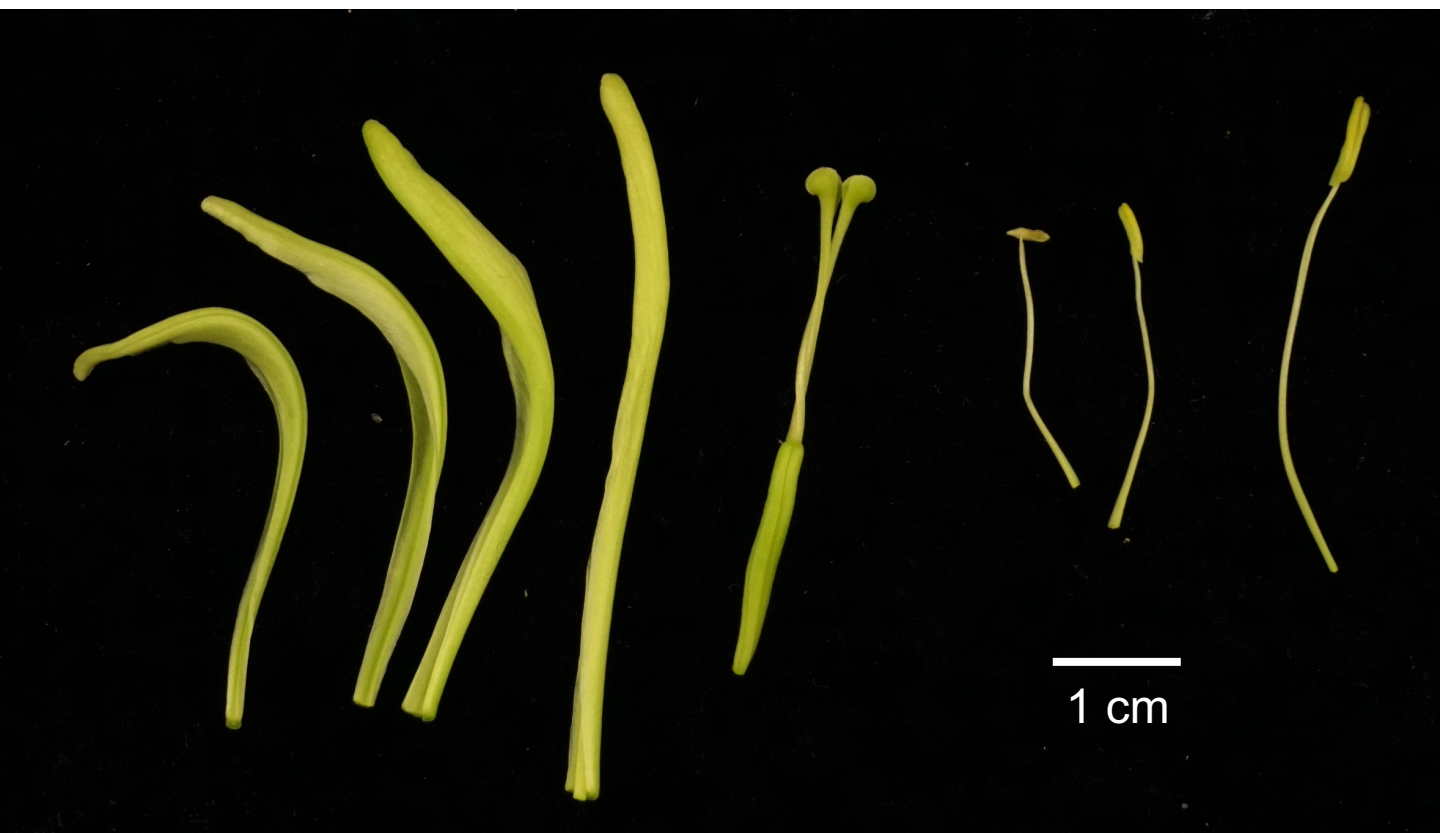

**Supplementary Figure S1** The flower of the line #3 transformed plant (Figure 2D) consisted of (from left to right) four tepals, one pistil, and three stamens.

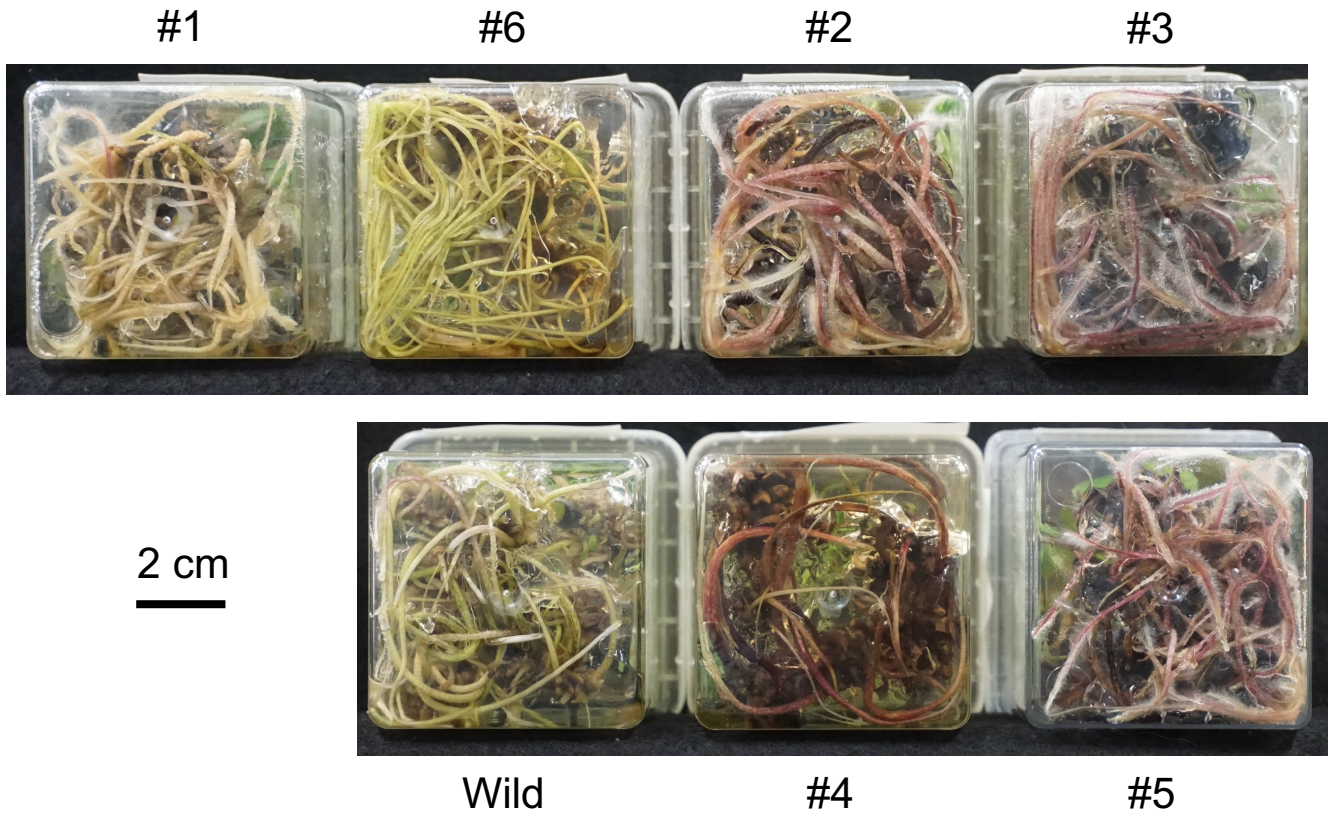

**Supplementary Figure S2** Root colors of transformed plants (lines #1–#6) and non-transformed plants (Wild) *in vitro*. Photographs were taken from the bottom of the culture vessels.

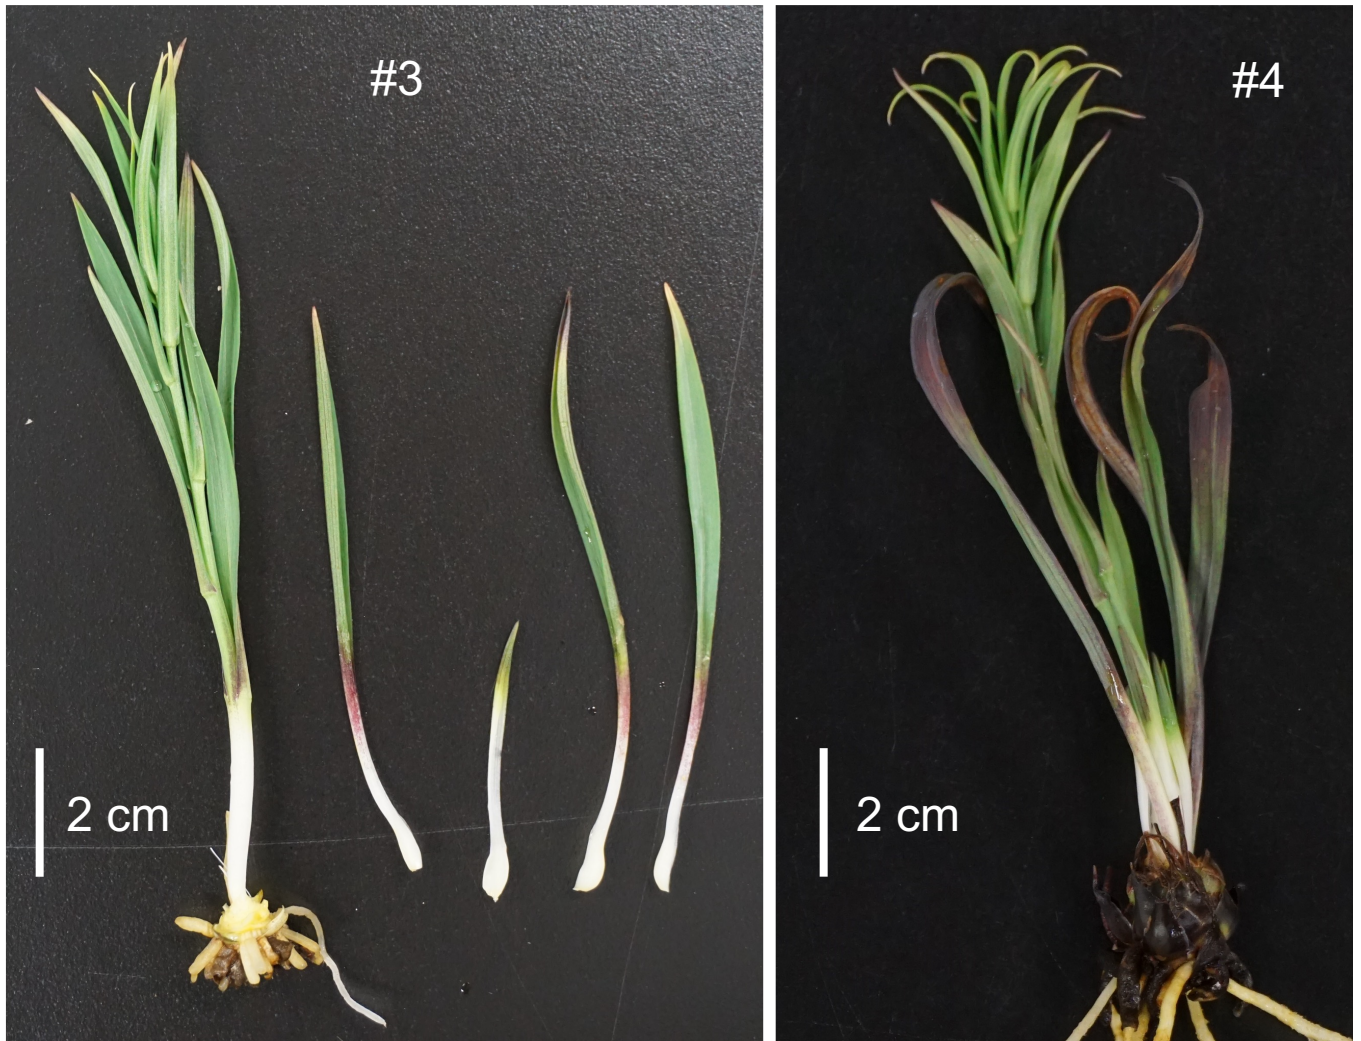

**Supplementary Figure S3** The transformed plants of lines #3 and #4, which were taken out of the pots (Figure 3). The line #3 plant consisted of an elongating shoot with 4 scaly leaves, and the line #4 plant consisted of an elongating shoot with 7 scaly leaves. The upper half of scaly leaves were deeply anthocyanin-pigmented in the line #4 plant.



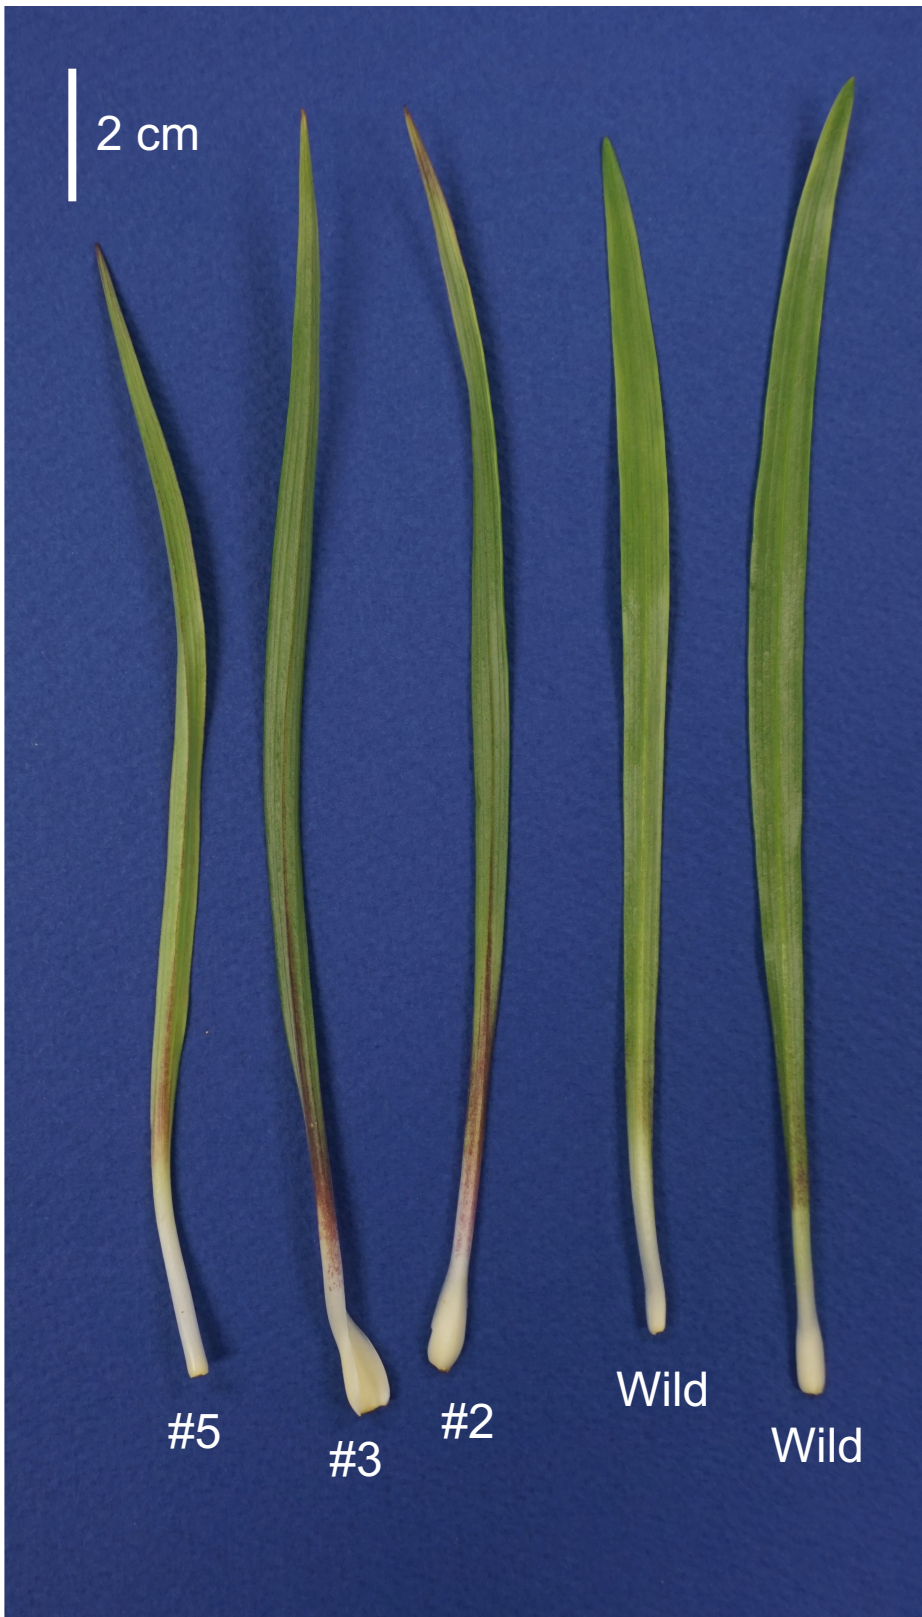

**Supplementary Figure S4** Abaxial side of scaly leaves of the transformed plants from lines #5, #3, and #2, and of two non-transformed plants (Wild).

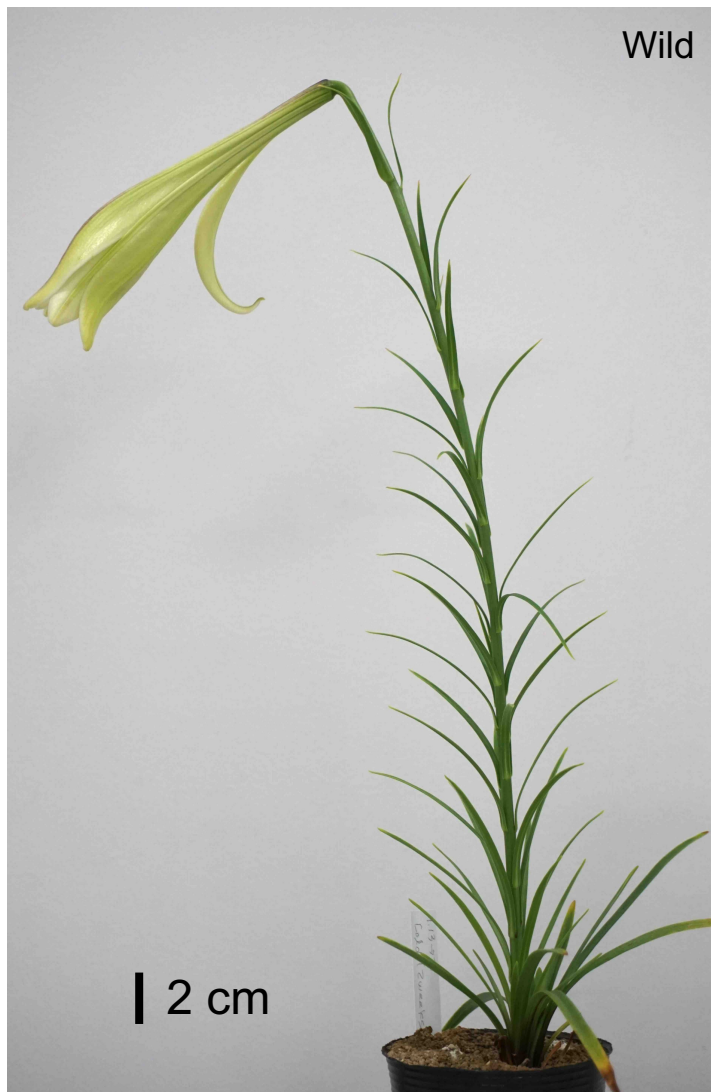

**Supplementary Figure S5** Appearances of a callus-derived non-transformed *L. formosanum* plant. Note that this bulb was subject to chilling to stimulate shoot elongation and flowering.
